# Supplementary material
Source: HighWire-hosted journal article supplement (https://erj.ersjournals.com/content/58/3/2102020)
Supplement: inline-supplementary-material-1 [file inline-supplementary-material-1.pdf]

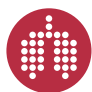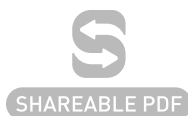

# Reply to: When adopting Global Lung Function Initiative reference values, can we also adapt them to a local context as needed?

Sanja Stanojevic<sup>1</sup>, Brendan Cooper<sup>2</sup>, Nicole Filipow<sup>3</sup>, Jane Kirkby<sup>4</sup>, Gregg Ruppel <sup>5</sup>,  
Irene Steenbruggen <sup>6</sup>, Bruce Thompson<sup>7</sup> and Graham Hall<sup>8,9</sup>

<sup>1</sup>Dept of Community Health and Epidemiology, Dalhousie University, Halifax, NS, Canada. <sup>2</sup>Queen Elizabeth Hospital, Lung Investigation Unit, Birmingham, UK. <sup>3</sup>Great Ormond Street Institute of Child Health, University College London, London, UK. <sup>4</sup>Sheffield Children's Hospital NHS Foundation Trust, Respiratory Laboratory, Sheffield, UK. <sup>5</sup>Dept of Pulmonary Critical Care and Sleep Medicine, Saint Louis University, Saint Louis, MO, USA. <sup>6</sup>Lung Function Laboratory, Isala Klinieken, Zwolle, The Netherlands. <sup>7</sup>School of Health Sciences, Swinburne University of Technology, Melbourne, Australia. <sup>8</sup>Children's Lung Health, Wal-yan Respiratory Research Centre, Telethon Kids Institute, Perth, Australia. <sup>9</sup>School of Physiotherapy and Exercise Science, Curtin University, Perth, Australia.

Sanja Stanojevic ([sanja.stanojevic@dal.ca](mailto:sanja.stanojevic@dal.ca))

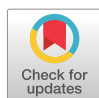

Shareable abstract (@ERSpublications)

Global Lung Function Initiative reference equations help to standardise interpretation of pulmonary function tests; however, there is a need to balance precision and generalisability with the uncertainty of interpretation <https://bit.ly/3iheRFv>

**Cite this article as:** Stanojevic S, Cooper B, Filipow N, *et al.* Reply to: When adopting Global Lung Function Initiative reference values, can we also adapt them to a local context as needed?. *Eur Respir J* 2021; 58: 2102020 [DOI: 10.1183/13993003.02020-2021].

This single-page version can be shared freely online.

Copyright ©The authors 2021. For reproduction rights and permissions contact [permissions@ersnet.org](mailto:permissions@ersnet.org)

Received: 20 July 2021  
Accepted: 21 July 2021

*Reply to S. Verbanck and co-workers:*

We thank S. Verbanck and co-workers for their insightful response to the recent official European Respiratory Society technical standards for Global Lung Function Initiative (GLI) reference lung volumes [1]. The data presented highlight the real-world impact of using published equations and how equipment or protocol offsets can impact clinical interpretation. We generally agree with S. Verbanck and co-workers that more precise approaches are ideal, and that is the ultimate goal of the GLI Network.
